# Supplementary material for: CBP binding outside of promoters and enhancers in Drosophila melanogaster
Source: PubMed Central journal article supplement (PMC4657240; doi:10.1186/s13072-015-0042-4), 2015-11-24

# Supplementary Figure 1

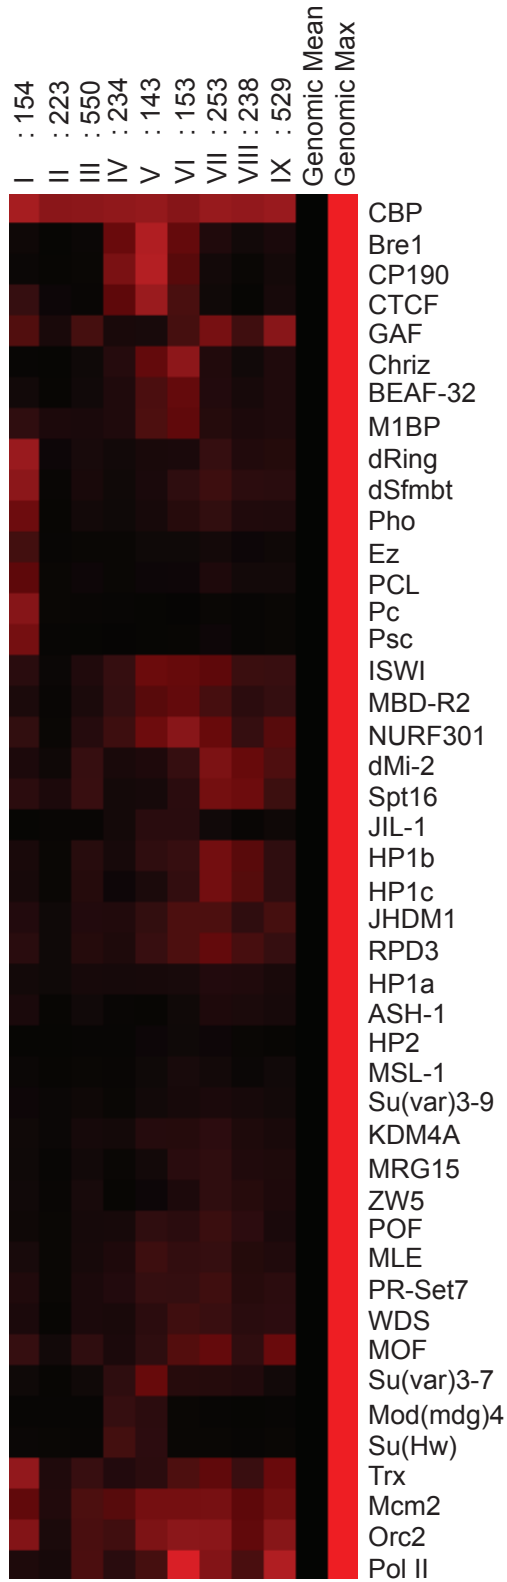

Supplement: 13072_2015_42_MOESM1_ESM.pdf [file 13072_2015_42_MOESM1_ESM.pdf]
