# Supplementary material for: CBP binding outside of promoters and enhancers in Drosophila melanogaster
Source: PubMed Central journal article supplement (PMC4657240; doi:10.1186/s13072-015-0042-4), 2015-11-24
Supplement: 13072_2015_42_MOESM4_ESM.pdf [file 13072_2015_42_MOESM4_ESM.pdf]

### Supplementary Figure 3

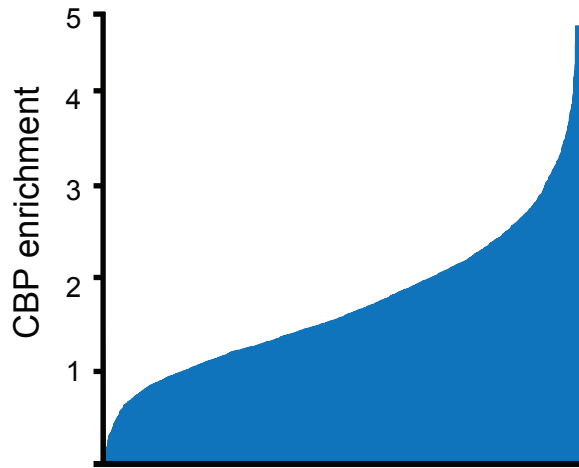

CP190-BEAF-32 regions

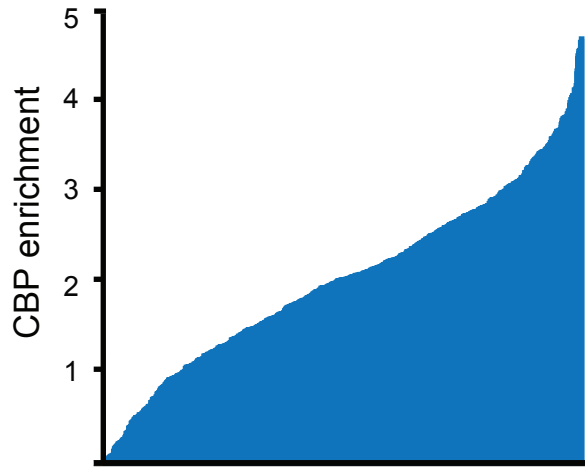

CP190-CTCF regions

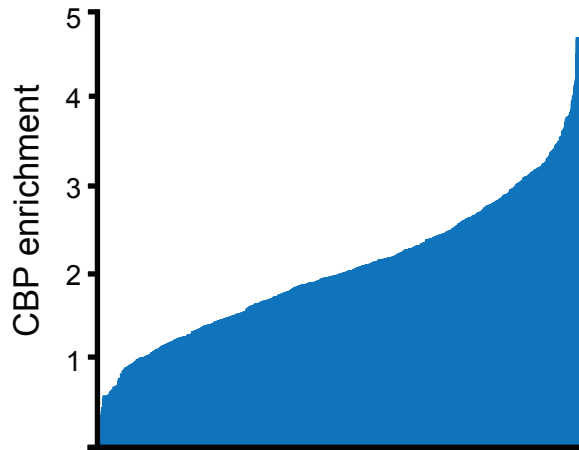

CP190-ZW5 regions

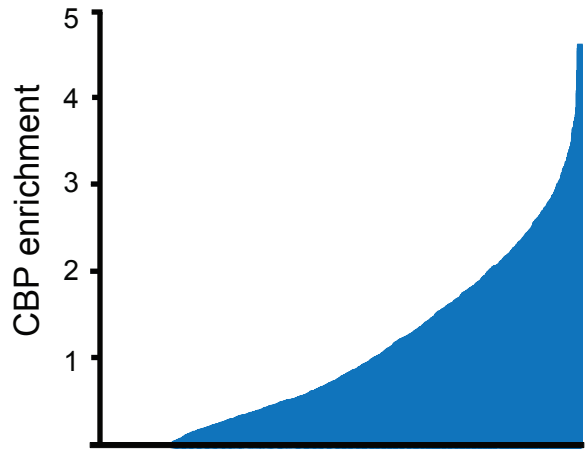

CP190-Su(Hw) regions
